# Supplementary material for: Bandgaps of noble and transition metal/ZIF-8 electro/catalysts: a computational study
Source: Royal Society of Chemistry journal article supplement (doi:10.1039/d0ra02943b), 2020-01-01
Supplement: d0ra02943b1.pdf [file d0ra02943b1.pdf]

## Band gap of noble and transition metal /ZIF-8 electro/catalysts: A computational study

Alireza Baghban<sup>1</sup>, Sajjad Habibzadeh<sup>1,2,\*</sup> Farzin Zokae Ashtiani<sup>2</sup>

<sup>1</sup> *Chemical Engineering Department, Amirkabir University of Technology (Tehran Polytechnic), Mahshahr Campus, Mahshahr, Iran*

<sup>2</sup> *Surface reaction and advanced energy materials laboratory, Chemical Engineering Department, Amirkabir University of Technology (Tehran Polytechnic), Tehran, Iran*

Figure S1 to Figure S8 indicate the band structures and projected density of states by addition of Ni, Mn, Co, Pd, Pt, Cu, Fe, and Ti atoms to pristine ZIF-8 framework. As can be seen, the bandgap values were decreased significantly by addition of Fe and Ti to this structure.

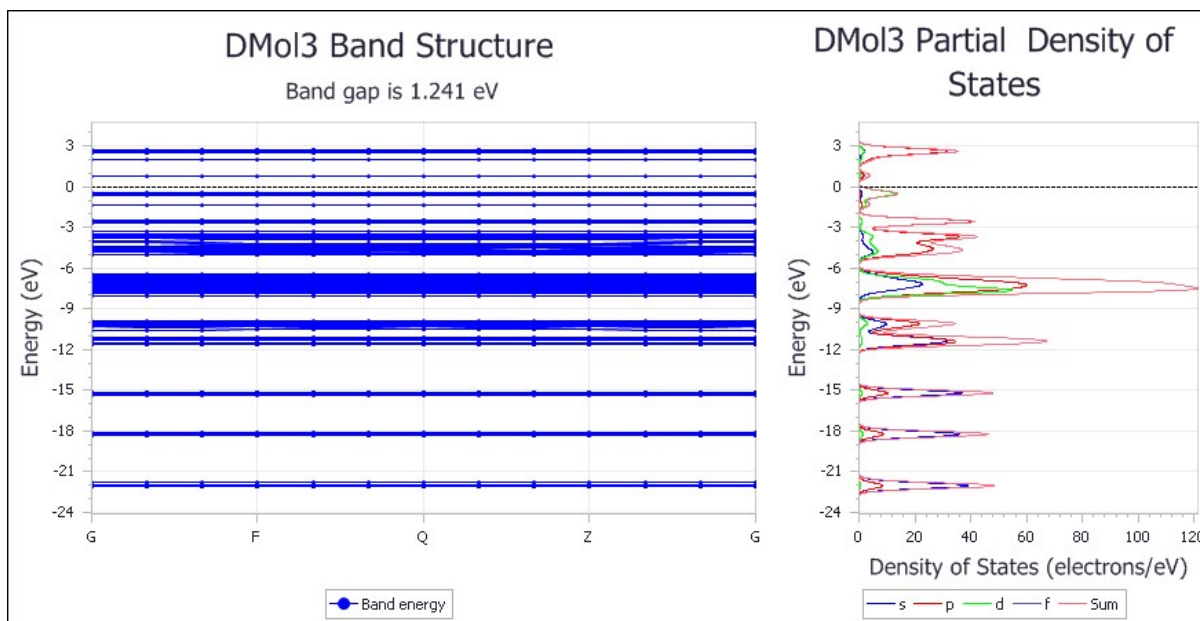

**Figure S1:** band structure and projected density of states for Co/ZIF-8

\* Corresponding author:  
Email: [sajjad.habibzadeh@aut.ac.ir](mailto:sajjad.habibzadeh@aut.ac.ir) (S. Habibzadeh)

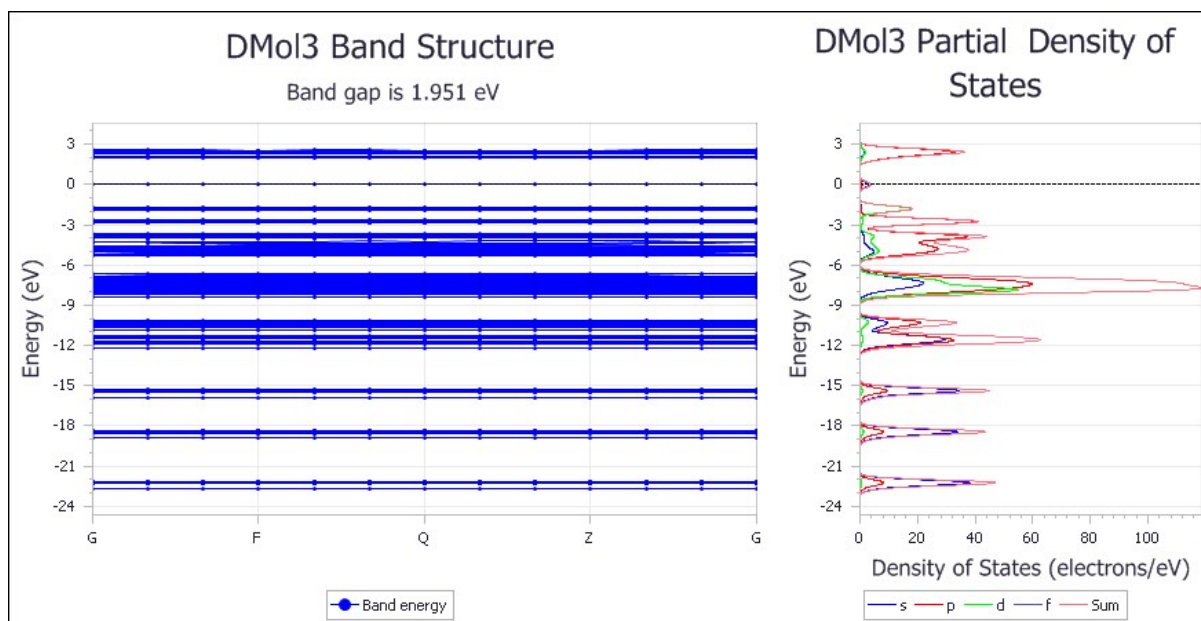

**Figure S2:** band structure and projected density of states for Cu/ZIF-8

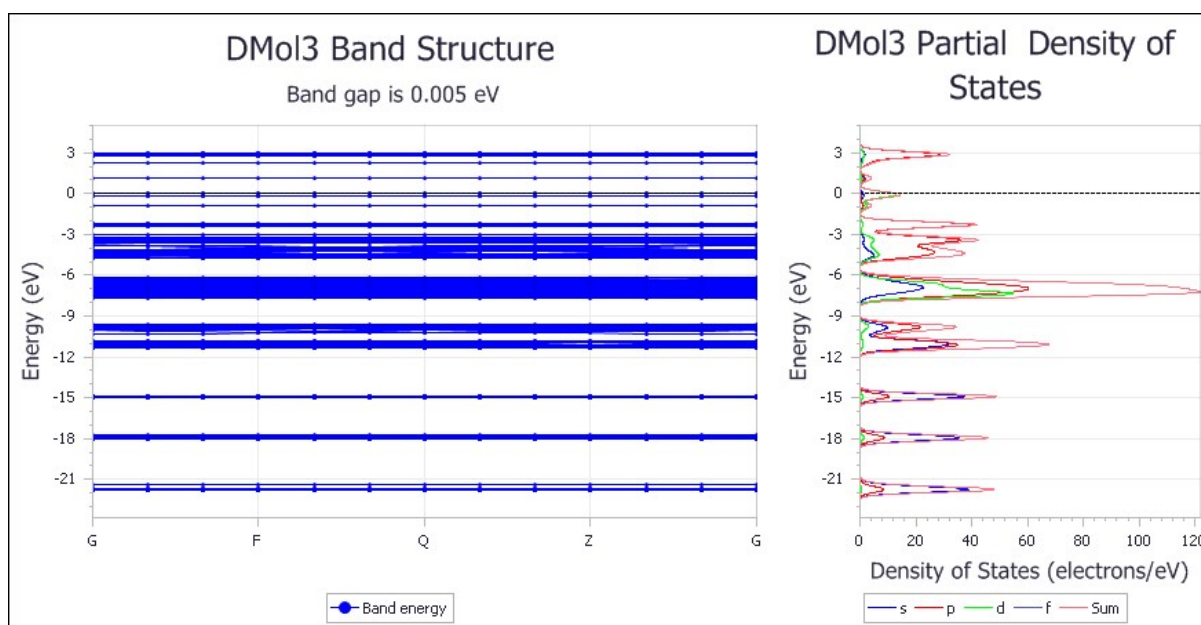

**Figure S3:** band structure and projected density of states for Fe/ZIF-8

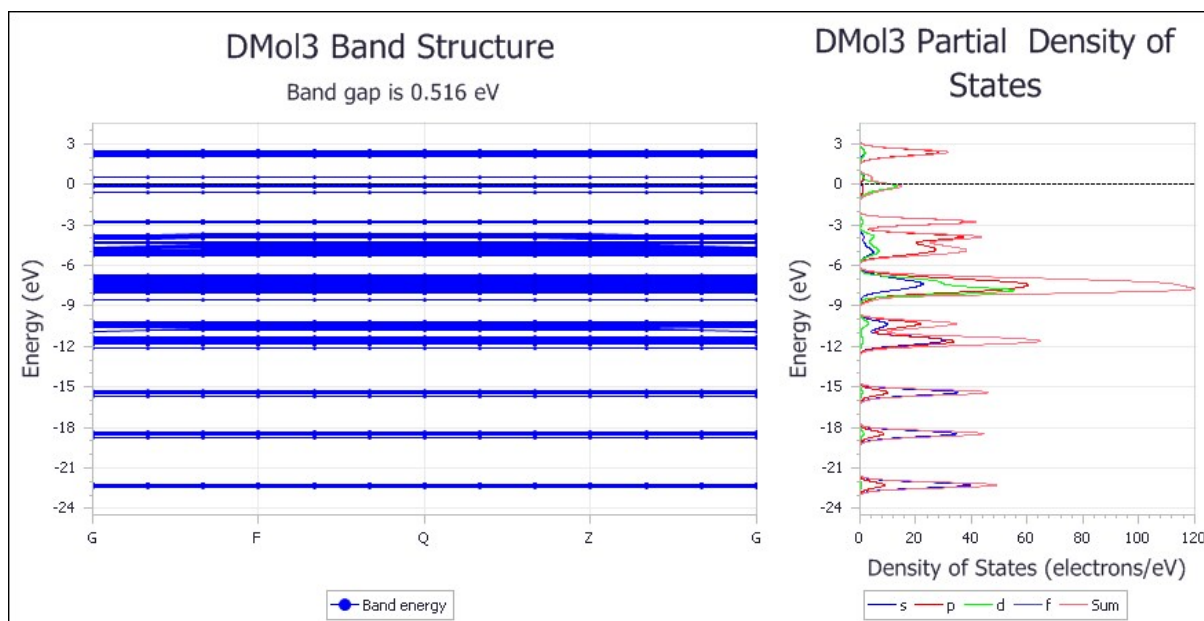

**Figure S4:** band structure and projected density of states for Mn/ZIF-8

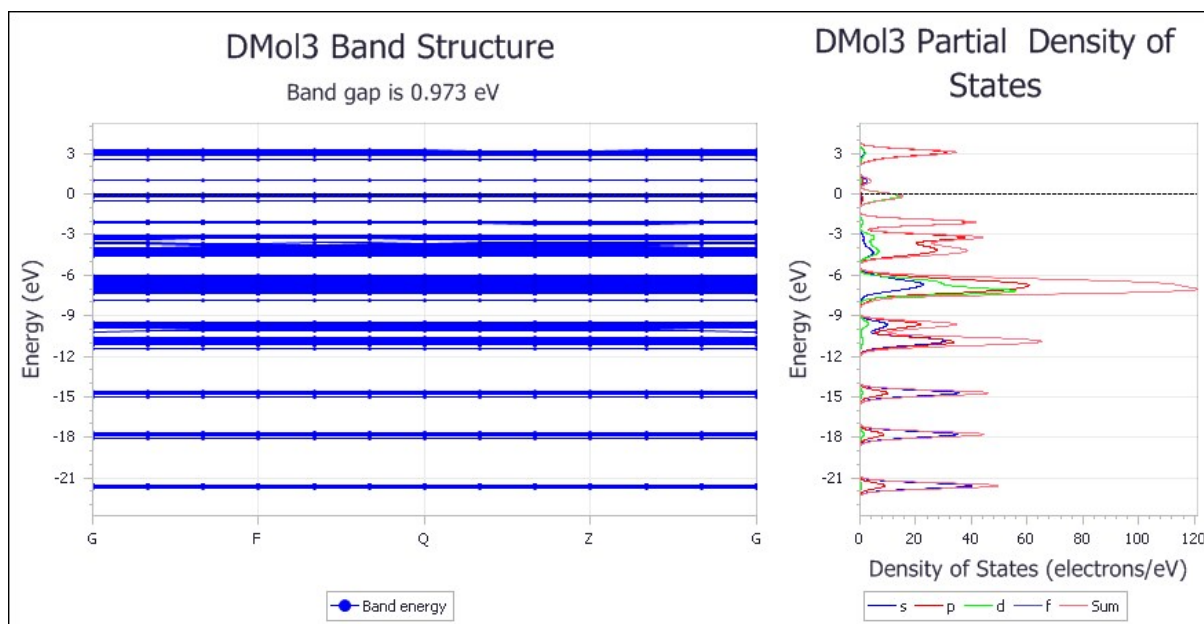

**Figure S5:** band structure and projected density of states for Ni/ZIF-8

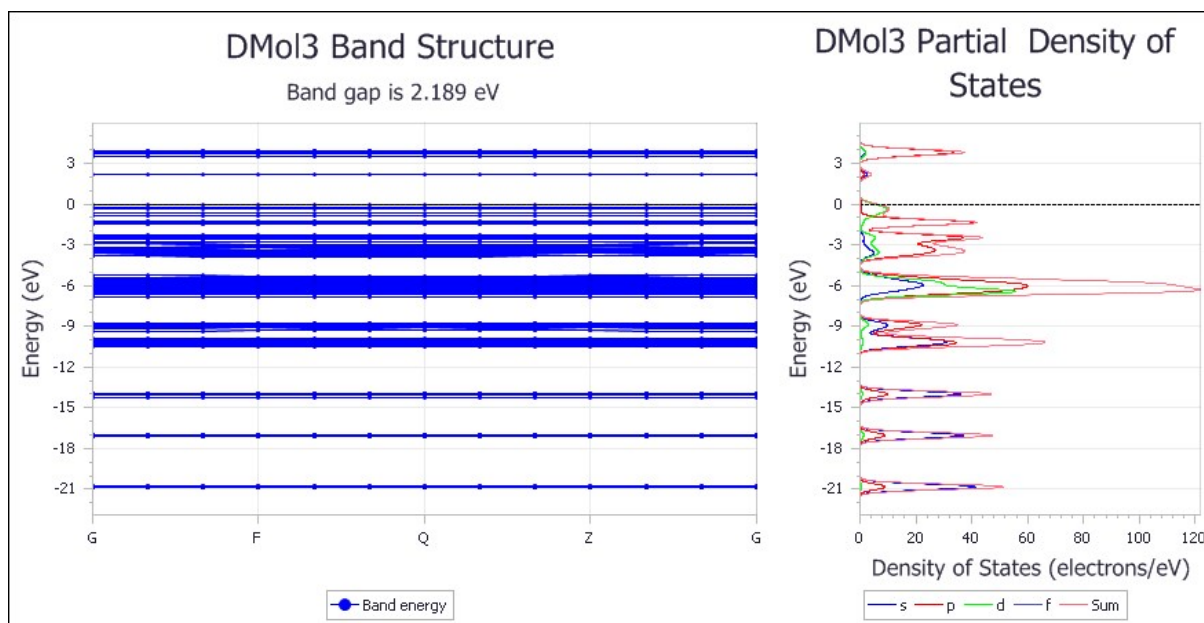

**Figure S6:** band structure and projected density of states for Pd/ZIF-8

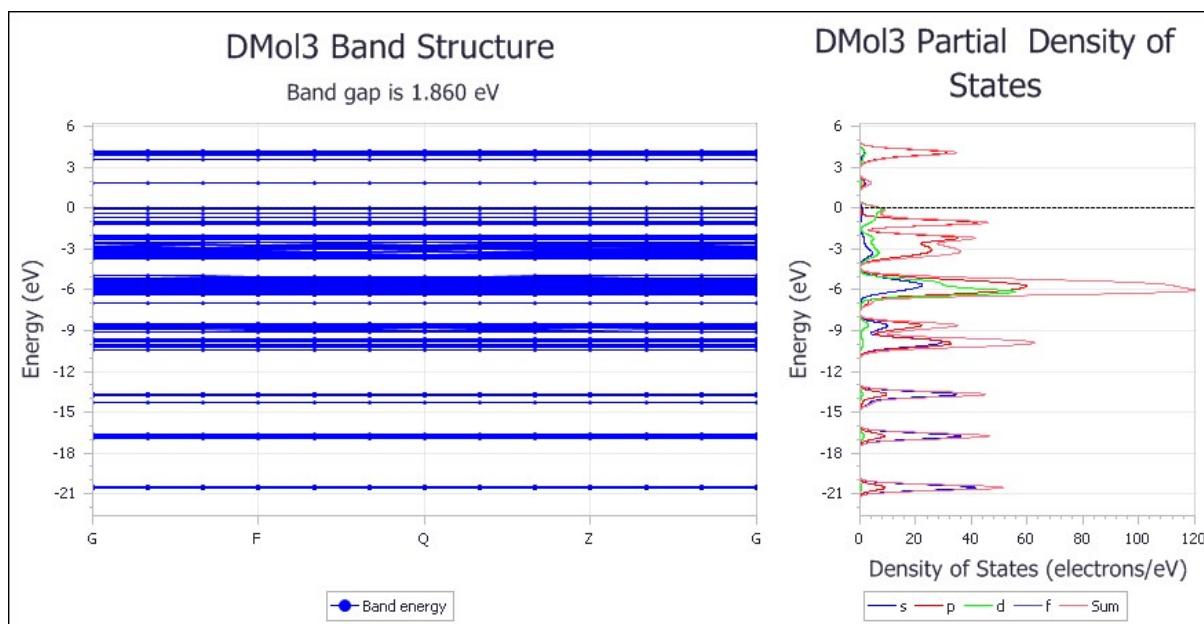

**Figure S7:** band structure and projected density of states for Pt/ZIF-8

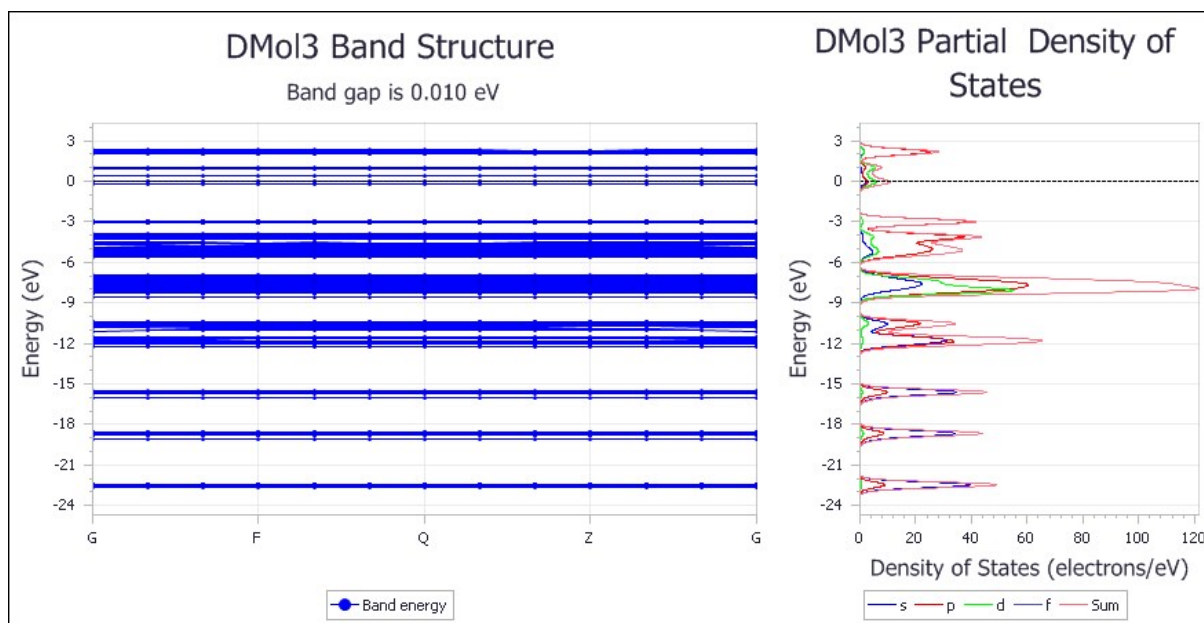

**Figure S8:** band structure and projected density of states for Pt/ZIF-8
